# Supplementary material
Source: PubMed Central journal article supplement (PMC3302345)
Supplement: supp_86.6.2978_FigS1-S3_TableS1-S2.pdf [file supp_86.6.2978_FigS1-S3_TableS1-S2.pdf]

## Supplementary Materials

**Supplementary Table 1.** The list of H5N1 and H1N1 viruses from which the codon optimized H5 and H1 HA were derived and used to make the influenza HA and NA pseudotype panel.

| Original strains                    | (Sub)clades | Accession Number |
|-------------------------------------|-------------|------------------|
| A/Hongkong/156/97                   | 0           | AF028709         |
| A/Thailand/1 (KAN-1)/04             | 1           | AY555150         |
| A/Vietnam/1203/04                   | 1           | EF541403         |
| A/Indonesia/5/05                    | 2. 1        | EU146622         |
| A/Turkey/65596/2006                 | 2. 2        | EF619998         |
| A/Xingjaing/1/2006                  | 2. 2        | FJ492886         |
| A/Common Magpie/Hong Kong/5052/2007 | 2. 3. 2     | CY036173         |
| A/Anhui/1/05                        | 2. 3        | DQ371928         |
| A/Shenzhen/406H/06                  | 2. 3        | EF137706         |
| A/Chichen/Guangxi/12/2004           | 2. 4        | DQ366330         |
| A/Chicken/Korea/es/2003             | 2. 5        | AY676035         |
| A/Silk Chicken/Hongkong/SF189/2001  | 3           | AF509021         |
| A/Goose/Guiyang/337/2006            | 4           | DQ992765         |
| A/Duck/Guangxi/1378/2004            | 5           | DQ320884         |
| A/Blackbird/Hunan/1/2004            | 6           | AY741213         |
| A/Duck/Hubei/wg/02                  | 6           | DQ997094         |
| A/Beijing/01/2003                   | 7. 1        | EF587277         |
| A/Chicken/Vietnam/NCVD-016/2008     | 7. 2        | FJ842476         |
| A/Chicken/Henan/16/2004             | 8           | AY950234         |
| A/Goose/Shantou/1621/2005           | 9           | DQ095628         |
| A/WSN/1933                          |             | CY034132         |

**Supplementary Table 2.** The list of primers for amplifying constant region sequences of  $\gamma 1$ ,  $\kappa 1$  and  $\lambda 1$  and variable region sequences of VH, V $\kappa$  and V $\lambda$  of human immunoglobulin

**Primer to amplify  $\gamma 1$ -constant,  $\kappa 1$ -constant and  $\lambda 1$ -constant region**

|                                    |                                                                 |
|------------------------------------|-----------------------------------------------------------------|
| Pmt- $\gamma 1$ -constant-forward  | GATACC <b>AGATCT</b> TACA GGTACC CCTCCACCAAG <b>GGGCC</b> CATC  |
| Pmt- $\gamma 1$ -constant-reverse  | CAGCGG TCTAGA <b>GTTTAAACT</b> TTATCA TTTACCCGGAGACAGGGAGAGG    |
| Pmt- $\kappa 1$ -constant-forward  | GATACC <b>AGATCT</b> CAC GGTACC <b>GTACGG</b> TGGCTGCACCATCTGTC |
| Pmt- $\kappa 1$ -constant-reverse  | CAGCGG TCTAGA <b>GTTTAAACT</b> TTATCA ACACTCTCCCCTGTTGAAGCTC    |
| pmt- $\lambda 1$ -constant-forward | GTTCCCGCC <b>CTCGAG</b> TGAGGAGCTCC                             |
| pmt- $\lambda 1$ -constant-reverse | GG TCTAGA <b>GTTTAAAC</b> TTATCA TGAACATTCTGTAGGGGCCACTG        |

**Primer to amplify the variable region of immunoglobulin heavy and light chain**

|             |                | Primer to amplify the variable region of immunoglobulin heavy |                                                                                   |                                                        |
|-------------|----------------|---------------------------------------------------------------|-----------------------------------------------------------------------------------|--------------------------------------------------------|
| primary PCR | forward primer | 5' L-VH 1                                                     | ACAGGTGCCCACTCCCAGGTGCAG                                                          |                                                        |
|             |                | 5' L-VH 3                                                     | AAGGTGCCAGTGTGARGTGCAG                                                            |                                                        |
|             |                | 5' L-VH 4/6                                                   | CCCAGATGGGTCTGTCCCAGGTGCAG                                                        |                                                        |
|             |                | 5' L-VH 5                                                     | CAAGGAGTCTGTTCCGAGGTGCAG                                                          |                                                        |
|             |                | reverse primer                                                | 3' C $\gamma$ CH1                                                                 | GGAAGGTGTGCACGCCGCTGGTC                                |
|             |                |                                                               | 3' C $\mu$ CH1                                                                    | GGGAATTCTCACAGGAGACGA                                  |
| nest PCR    | forward primer | 5' Sfil VH1                                                   | TACTACT <b>GGCCGTCGTGGC</b> CTTTGTTGGCCTCTCGCTCGGG GTACATTCC CAGGTGCAGCTGGTGCAG   |                                                        |
|             |                | 5' Sfil VH1/5                                                 | TACTACT <b>GGCCGTCGTGGC</b> CTTTGTTGGCCTCTCGCTCGGG GTACATTCC GAGGTGCAGCTGGTGCAG   |                                                        |
|             |                | 5' Sfil VH3                                                   | TACTACT <b>GGCCGTCGTGGC</b> CTTTGTTGGCCTCTCGCTCGGG GTACATTCT GAGGTGCAGCTGGTGGAG   |                                                        |
|             |                | 5' Sfil VH3-23                                                | TACTACT <b>GGCCGTCGTGGC</b> CTTTGTTGGCCTCTCGCTCGGG GTACATTCT GAGGTGCAGCTGTTGGAG   |                                                        |
|             |                | 5' Sfil VH4                                                   | TACTACT <b>GGCCGTCGTGGC</b> CTTTGTTGGCCTCTCGCTCGGG GTACATTCC CAGGTGCAGCTGCAGGAG   |                                                        |
|             |                | 5' Sfil VH 4-34                                               | TACTACT <b>GGCCGTCGTGGC</b> CTTTGTTGGCCTCTCGCTCGGG GTACATTCC CAGGTGCAGCTACAGCAGTG |                                                        |
|             |                | 5' Sfil VH 1-18                                               | TACTACT <b>GGCCGTCGTGGC</b> CTTTGTTGGCCTCTCGCTCGGG GTACATTCC CAGGTTACAGCTGGTGCAG  |                                                        |
|             |                | 5' Sfil VH 1-24                                               | TACTACT <b>GGCCGTCGTGGC</b> CTTTGTTGGCCTCTCGCTCGGG GTACATTCC CAGGTCCAGCTGGTACAG   |                                                        |
|             |                | 5' Sfil VH3-33                                                | TACTACT <b>GGCCGTCGTGGC</b> CTTTGTTGGCCTCTCGCTCGGG GTACATTCT CAGGTGCAGCTGGTGGAG   |                                                        |
|             |                | 5' Sfil VH 3-9                                                | TACTACT <b>GGCCGTCGTGGC</b> CTTTGTTGGCCTCTCGCTCGGG GTACATTCT GAAGTGCAGCTGGTGGAG   |                                                        |
|             |                | 5' Sfil VH4-39                                                | TACTACT <b>GGCCGTCGTGGC</b> CTTTGTTGGCCTCTCGCTCGGG GTACATTCC CAGCTGCAGCTGCAGGAG   |                                                        |
|             |                | 5' Sfil VH 6-1                                                | TACTACT <b>GGCCGTCGTGGC</b> CTTTGTTGGCCTCTCGCTCGGG GTACATTCC CAGGTACAGCTGCAGCAG   |                                                        |
|             |                | reverse primer                                                | 3' Apal JH 1/2/4/5                                                                | GACCGAT <b>GGGCC</b> CTTGGTGGAG GCTGAGGAGACGGTGACCAG   |
|             |                |                                                               | 3' Apal JH 3                                                                      | GACCGAT <b>GGGCC</b> CTTGGTGGAG GCTGAAGAGACGGTGACCATTG |
|             |                |                                                               | 3' Apal JH 6                                                                      | GACCGAT <b>GGGCC</b> CTTGGTGGAG GCTGAGGAGACGGTGACCCTG  |

**Primer to amplify the variable region of immunoglobulin kappa chain**

|              |                |                 |                                                         |                               |                                               |  |
|--------------|----------------|-----------------|---------------------------------------------------------|-------------------------------|-----------------------------------------------|--|
| primary PCR  | forward primer | 5' L Vk 1/2     | ATGAGGSTCCCYGCTCAGCTGCTGG                               |                               |                                               |  |
|              |                | 5' L Vk 3       | CTCTTCTCCTGCTACTCTGGCTCCCAG                             |                               |                                               |  |
|              |                | 5' L Vk 4       | ATTTCTCTGTTGCTCTGGATCTCTG                               |                               |                                               |  |
|              | reverse primer | 3' Ck 543       | GTTTCTCGTAGTCTGCTTTGCTCA                                |                               |                                               |  |
| 1st nest PCR | forward primer | 5' Pan Vk       | ATGACCCAGWCTCCABYCWCCCTG                                |                               |                                               |  |
|              | reverse primer | 3' Ck 494       | GTGCTGTCCTTGCTGTCCTGCT                                  |                               |                                               |  |
| 2nd nest PCR | forward primer | 5'Sfil Vk 1-5   | TCGCCT <b><i>GGCCGTCGTGGCC</i></b> TTTGTGGCCTCTCGCTCGGG | GTACATTCTGACATCCAGATGACCCAGTC |                                               |  |
|              |                | 5'Sfil Vk 1-9   | TCGCCT <b><i>GGCCGTCGTGGCC</i></b> TTTGTGGCCTCTCGCTCGGG | GTACATTGACATCCAGTTGACCCAGTCT  |                                               |  |
|              |                | 5'Sfil Vk 1D-43 | TCGCCT <b><i>GGCCGTCGTGGCC</i></b> TTTGTGGCCTCTCGCTCGGG | GTACATTGTGCCATCCGGATGACCCAGTC |                                               |  |
|              |                | 5'Sfil Vk 2-24  | TCGCCT <b><i>GGCCGTCGTGGCC</i></b> TTTGTGGCCTCTCGCTCGGG | GTACATGGGGATATTGTGATGACCCAGAC |                                               |  |
|              |                | 5'Sfil Vk 2-28  | TCGCCT <b><i>GGCCGTCGTGGCC</i></b> TTTGTGGCCTCTCGCTCGGG | GTACATGGGGATATTGTGATGACTCAGTC |                                               |  |
|              |                | 5'Sfil Vk 2-30  | TCGCCT <b><i>GGCCGTCGTGGCC</i></b> TTTGTGGCCTCTCGCTCGGG | GTACATGGGGATGTTGTGATGACTCAGTC |                                               |  |
|              |                | 5'Sfil Vk 3-11  | TCGCCT <b><i>GGCCGTCGTGGCC</i></b> TTTGTGGCCTCTCGCTCGGG | GTACATTAGAAATGTTGACACAGTC     |                                               |  |
|              |                | 5' Sfil Vk 3-15 | TCGCCT <b><i>GGCCGTCGTGGCC</i></b> TTTGTGGCCTCTCGCTCGGG | GTACATTAGAAATGATGACGACAGTC    |                                               |  |
|              |                | 5' Sfil Vk 3-20 | TCGCCT <b><i>GGCCGTCGTGGCC</i></b> TTTGTGGCCTCTCGCTCGGG | GTACATTAGAAATGTTGACGACAGTC    |                                               |  |
|              |                | 5' Sfil Vk 4-1  | TCGCCT <b><i>GGCCGTCGTGGCC</i></b> TTTGTGGCCTCTCGCTCGGG | GTACATTGACATCGTATGACCCAGTC    |                                               |  |
|              |                |                 | reverse primer                                          | 3' BsiWI Jk 1/4               | <b><i>GCCACCGTACG</i></b> TTTGATYTCCACCTTGGTC |  |
|              |                |                 |                                                         | 3' BsiWI Jk 2                 | <b><i>GCCACCGTACG</i></b> TTTGATCTCCAGCTTGGTC |  |
|              |                |                 |                                                         | 3' BsiWI Jk                   | <b><i>GCCACCGTACG</i></b> TTTGATATCCACTTTGGTC |  |
|              |                |                 |                                                         | 3' BsiWI Jk 5                 | <b><i>GCCACCGTACG</i></b> TTTAATCTCCAGTCGTGTC |  |

**Primer to amplify the variable region of immunoglobulin lambda chain**

|             |                |                |                                                      |                             |
|-------------|----------------|----------------|------------------------------------------------------|-----------------------------|
| primary PCR | forward primer | 5' L Vλ 1      | GGTCTGGGCCCAGTCTGTGCTG                               |                             |
|             |                | 5' L Vλ 2      | GGTCTGGGCCCAGTCTGCCCTG                               |                             |
|             |                | 5' L Vλ 3      | GCTCTGTGACCTCCTATGAGCTG                              |                             |
|             |                | 5' L Vλ 4/5    | GGTCTCTCTCSCAGCYTGCTG                                |                             |
|             |                | 5' L Vλ 6      | GTTCTTGGGCAATTTTATGCTG                               |                             |
|             |                | 5' L Vλ 7      | GGTCCAATTCYAGGCTGTGGTG                               |                             |
|             |                | 5' L Vλ 8      | GAGTGGATTCTCAGACTGTGGTG                              |                             |
|             |                |                | reverse primer                                       | 3' Cλ                       |
| nest PCR    | forward primer | 5'Sfil Vλ 1    | CCT <b><i>GGCCGTCGTGGCC</i></b> TTTGTGGCCTCTCGCTCGGG | TCCTGGGCCAGTCTGTGCTGACKCAG  |
|             |                | 5' Sfil Vλ 2   | CCT <b><i>GGCCGTCGTGGCC</i></b> TTTGTGGCCTCTCGCTCGGG | TCCTGGGCCAGTCTGCCCTGACTCAG  |
|             |                | 5' Sfil Vλ 3   | CCT <b><i>GGCCGTCGTGGCC</i></b> TTTGTGGCCTCTCGCTCGGG | TCTGTGACCTCCTATGAGCTGACWCAG |
|             |                | 5' Sfil Vλ 4/5 | CCT <b><i>GGCCGTCGTGGCC</i></b> TTTGTGGCCTCTCGCTCGGG | TCTCTCTCSCAGCYTGCTGACTCA    |
|             |                | 5' Sfil Vλ 6   | CCT <b><i>GGCCGTCGTGGCC</i></b> TTTGTGGCCTCTCGCTCGGG | TCTTGGGCAATTTTATGCTGACTCAG  |
|             |                | 5' Sfil Vλ 7/8 | CCT <b><i>GGCCGTCGTGGCC</i></b> TTTGTGGCCTCTCGCTCGGG | TCCAATTCYAGRCTGTGGTGACYCAG  |
|             |                |                | reverse primer                                       | 3' XhoI Cλ                  |

Restriction sites are indicated in bold and italic.

**Supplementary Fig. 1.** Protein sequences of VH and VL of antibodies 65C6, 3C11 and 100F4 and their VH and VL germline usages.

100F4 –LV

---

|               |                             |    |                        |                |                 |         |              |    |
|---------------|-----------------------------|----|------------------------|----------------|-----------------|---------|--------------|----|
| <u>ID%</u>    |                             |    | <-----FWR1----->       | <---CDR1--->   | <-----FWR2--->  | <-CDR2> | <----->      |    |
|               | <a href="#">100F4-LV</a>    | 1  | QSVLTQPPSVSGAPGQRVTISC | TGGSSNIGAGYSVH | WYQQLPGTAPKLLIY | GSNSRPS | GVPDRFSGSKSG | 70 |
| 93.0 (93/100) | <a href="#">IGLV1-40*01</a> | 1  | .....                  | ..S.....D..    | .....           | .NSN... | .....        | 70 |
| <u>ID%</u>    |                             |    | ---FWR3----->          |                |                 |         |              |    |
|               | <a href="#">100F4-LV</a>    | 71 | TSASLAITGLRPEDEADYYC   | QSYDSSLSGS     | 100             |         |              |    |
| 93.0 (93/100) | <a href="#">IGLV1-40*01</a> | 71 | .....QA.....           | .....          | 100             |         |              |    |

---

100F4-HV

---

|              |                             |    |                               |         |                |                  |      |    |
|--------------|-----------------------------|----|-------------------------------|---------|----------------|------------------|------|----|
| <u>ID%</u>   |                             |    | <-----FWR1----->              | <-CDR1> | <-----FWR2---> | <-----CDR2-----> | <--- |    |
|              | <a href="#">100F4-HV</a>    | 1  | QLQLQESGLGLVKPSETLSLCTVSGDSVS | SGSYYS  | WLRQPPGKLEWIG  | NMHGSGHTNYNPSLKS | RVT  | 70 |
| 87.9 (87/99) | <a href="#">IGHV4-61*03</a> | 1  | .V.....P.....G...             | .....   | .I.....        | YIYY..S.....     | ...  | 70 |
| <u>ID%</u>   |                             |    | -----FWR3----->               |         |                |                  |      |    |
|              | <a href="#">100F4-HV</a>    | 71 | ITPDTSKNHFSRLSSVTAADTAVYYCAR  | 99      |                |                  |      |    |
| 87.9 (87/99) | <a href="#">IGHV4-61*03</a> | 71 | .SV.....K.....                | 99      |                |                  |      |    |

---

## 65C6-LV

---

| <u>ID%</u>   |                              | <-----FWR1-----> | <---CDR1--->            | <----FWR2---> | <--CDR2>        | <----->       |                  |
|--------------|------------------------------|------------------|-------------------------|---------------|-----------------|---------------|------------------|
|              | <a href="#">65C6-LV</a>      | 1                | EIVLTQSPLTSLVSPGERATLSC | RASQSVSSN-LA  | WYQQMPGQAPRLLIY | GASTRAT       | GIPARLSGSASGT 69 |
| 94.7 (90/95) | <a href="#">IGKV3D-15*01</a> | 1                | ...M...A.....           | .....-..      | ...K.....       | .....F...G... | 69               |
| <u>ID%</u>   |                              |                  | --FWR3----->            |               |                 |               |                  |
|              | <a href="#">65C6-LV</a>      | 70               | EFTLTISSLQSEDFAVYYC     | QQYNNWP       |                 |               | 95               |
| 94.7 (90/95) | <a href="#">IGKV3D-15*01</a> | 70               | .....                   | .....         |                 |               | 95               |

---

## 65C6-HV

---

| <u>ID%</u>   |                            | <-----FWR1-----> | <CR1>                          | <----FWR2---> | <-----CDR2-----> | <---             |         |
|--------------|----------------------------|------------------|--------------------------------|---------------|------------------|------------------|---------|
|              | <a href="#">65C6-HV</a>    | 1                | EVQLVQSGAEVKKPGESLRISCKGFAYSST | YFWIS         | WVRQMPGKGPEWMG   | RIDPTDSYINYSFSFG | HVTI 70 |
| 88.7 (86/97) | <a href="#">IGHV5-a*03</a> | 1                | .....SG..F. SY...              | .....L....    | ...S...T.....    | .....            | 70      |
| <u>ID%</u>   |                            |                  | -----FWR3----->                |               |                  |                  |         |
|              | <a href="#">65C6-HV</a>    | 71               | SVDRSISTVYLVWSSLKASDTAMYYCA-   |               |                  |                  | 97      |
| 88.7 (86/97) | <a href="#">IGHV5-a*03</a> | 71               | .A.K...A.....                  | R             |                  |                  | 98      |

---

### 3C11-KV

---

|               |                     |    |                        |                   |                 |         |         |     |
|---------------|---------------------|----|------------------------|-------------------|-----------------|---------|---------|-----|
| <u>ID%</u>    |                     |    | <-----FWR1----->       | <----CDR1----->   | <----FWR2-->    | <-CDR2> | <-----  |     |
|               | <u>3C11-KV</u>      | 1  | EIVMTQSPLTLPVTPGAPASIS | RSSQSLHSD-G-YNYLD | WYLQKPGQSPQLLIY | LGSHRAS | GVPDRFS | 68  |
| 95.0 (95/100) | <u>IGKV2D-28*01</u> | 1  | D.....S.....E.....     | .....N-.....      | .....           | ...N... | .....   | 68  |
| <u>ID%</u>    |                     |    | -----FWR3----->        |                   |                 |         |         |     |
|               | <u>3C11-KV</u>      | 69 | GSGSGTDFTLKISRVEAEDVGY | YQC               | MQALQTP         |         |         | 100 |
| 95.0 (95/100) | <u>IGKV2D-28*01</u> | 69 | .....                  | .....             |                 |         |         | 100 |

---

### 3C11-HV

---

|              |                   |    |                          |       |              |                  |                   |         |
|--------------|-------------------|----|--------------------------|-------|--------------|------------------|-------------------|---------|
| <u>ID%</u>   |                   |    | <-----FWR1----->         | <CR1> | <----FWR2--> | <-----CDR2-----> | <---              |         |
|              | <u>3C11-HV</u>    | 1  | QVQLVQSGAEVKETGESLNISCKV | SGNFP | SYIIS        | WVRQMPGNLEWMG    | RIDPSDSDTNYRPSFQG | HVTI 70 |
| 85.7 (84/98) | <u>IGHV5-a*03</u> | 1  | E.....KP....R....G..YS.T | ..W.. | .....K.....  | .....Y...S.....  | .....             | 70      |
| <u>ID%</u>   |                   |    | -----FWR3----->          |       |              |                  |                   |         |
|              | <u>3C11-HV</u>    | 71 | SADKSTSTAYLQWRSLKASDTAMY | CAR   |              |                  |                   | 98      |
| 85.7 (84/98) | <u>IGHV5-a*03</u> | 71 | .....I.....S.....        | ..... |              |                  |                   | 98      |

---

Results were obtained from IgbLAST(<http://www.ncbi.nlm.nih.gov/projects/igblast/>) using the mAbs Vh and Vh amino acids sequence. amino acid identities are shown as dots.

**Supplementary Fig. 2.** Titration of antibody 65C6 against 13 single surface mutants of HA as compared to parental subclade 7.1 HA by PN assay. A. Resistant mutants. B. Susceptible mutants.

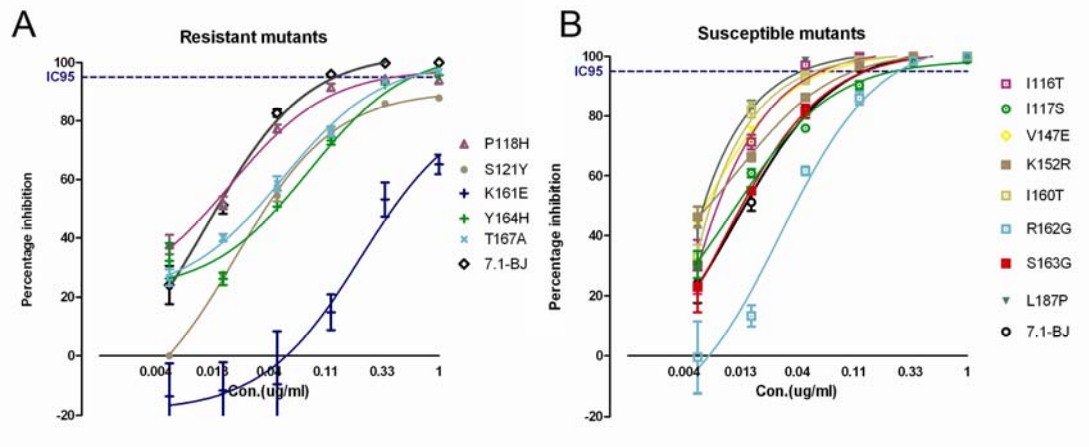

**Supplementary Fig. 3.** Sequence comparison of amino acid residues 118, 121, 161, 164 and 167 (highlight by red frame) involved in neutralization epitope of antibody 65C6.

| Consensus sequence                                  | NDL <span style="border: 1px solid red;">C</span> YPGDFNDY <span style="border: 1px solid red;">E</span> ELKHL <span style="border: 1px solid red;">L</span> SRIN <span style="border: 1px solid red;">H</span> FEK <span style="border: 1px solid red;">I</span> Q <span style="border: 1px solid red;">I</span> PKES <span style="border: 1px solid red;">S</span> WSNHEASSGVSSAC <span style="border: 1px solid red;">P</span> YQ <span style="border: 1px solid red;">G</span> KSS <span style="border: 1px solid red;">F</span> FR |
|-----------------------------------------------------|-----------------------------------------------------------------------------------------------------------------------------------------------------------------------------------------------------------------------------------------------------------------------------------------------------------------------------------------------------------------------------------------------------------------------------------------------------------------------------------------------------------------------------------------|
| CAA24269 A/Aichi/2/1968 (H3N2)                      | SN...Y.VP..AS.RS.VASSGTL.---F.TEGFT.TGVTQNG.-.N..KRGPG.G..S                                                                                                                                                                                                                                                                                                                                                                                                                                                                             |
| ACF54598 A/WSN/1933 (H1N1)                          | .GA.....I.....REQ..SVSSL.RFE.F.....P..TFN-.TAS.SHR.....Y.                                                                                                                                                                                                                                                                                                                                                                                                                                                                               |
| ACQ55359 A/California/07/2009 (H1N1)                | .GT.....I.....REQ..SVSS..RFE.F..T...P..DSNK..TA...HA.AK...YK                                                                                                                                                                                                                                                                                                                                                                                                                                                                            |
| AAA64366 A/Singapore/1/1957 (H2N2)                  | DG.....S.....SVK...VK.L...-DR.TQ.TTTG.-.R..AVS.NP....                                                                                                                                                                                                                                                                                                                                                                                                                                                                                   |
| ABD28180 A/Anhui/1/2005 (H5N1)                      | .....N.....-.....D.....TP...                                                                                                                                                                                                                                                                                                                                                                                                                                                                                                            |
| ABQ58979 A/Beijing/01/2003 (H5N1)                   | .....-.....L.RP...                                                                                                                                                                                                                                                                                                                                                                                                                                                                                                                      |
| ABE68931 A/Goose/Shantou/1621/05 (H5N1)             | .....-.....L.P...                                                                                                                                                                                                                                                                                                                                                                                                                                                                                                                       |
| AAC40508 A/Hong Kong/156/97 (H5N1)                  | .....N.....D.....L.R...                                                                                                                                                                                                                                                                                                                                                                                                                                                                                                                 |
| ABW06108 A/Indonesia/5/2005 (H5N1)                  | .....S.....D.....L.SP...                                                                                                                                                                                                                                                                                                                                                                                                                                                                                                                |
| ABO36644 A/Shenzhen/406H/2006 (H5N1)                | .....N.....D.....TP...                                                                                                                                                                                                                                                                                                                                                                                                                                                                                                                  |
| AAO52864 A/Silky Chicken/Hong Kong/SF189/01 (H5N1)  | .....-.....L.....                                                                                                                                                                                                                                                                                                                                                                                                                                                                                                                       |
| AAS65615 A/Thailand/1 (KAN-1)/2004 (H5N1)           | .....S.....L.....R.....                                                                                                                                                                                                                                                                                                                                                                                                                                                                                                                 |
| ABQ58925 A/Turkey/65596/2006 (H5N1)                 | .....N.....D.....R.....                                                                                                                                                                                                                                                                                                                                                                                                                                                                                                                 |
| ABP51977 A/Viet Nam/1203/2004 (H5N1)                | .....-.....S.....L.....                                                                                                                                                                                                                                                                                                                                                                                                                                                                                                                 |
| ACJ68614 A/Xinjiang/1/2006 (H5N1)                   | .....N.....D.....R.....                                                                                                                                                                                                                                                                                                                                                                                                                                                                                                                 |
| AAW19638 A/blackbird/Hunan/1/2004 (H5N1)            | .....-.....D.....NP...                                                                                                                                                                                                                                                                                                                                                                                                                                                                                                                  |
| ABD14809 A/chicken/Guangxi/12/2004 (H5N1)           | .....I.....D.....                                                                                                                                                                                                                                                                                                                                                                                                                                                                                                                       |
| AAK53508 A/chicken/Henan/16/2004 (H5N1)             | .G.....-.....                                                                                                                                                                                                                                                                                                                                                                                                                                                                                                                           |
| AAV97603 A/chicken/Korea/ES/03 (H5N1)               | .....N.....D.....R.....                                                                                                                                                                                                                                                                                                                                                                                                                                                                                                                 |
| ACO07033 A/chicken/Vietnam/NCVD-016/2008 (H5N1)     | .G.....L.K..K...-Y.....A..S.L.EP...                                                                                                                                                                                                                                                                                                                                                                                                                                                                                                     |
| ACJ26242 A/common magpie/Hong Kong/5052/2007 (H5N1) | .....N.....D.....L.....N.....                                                                                                                                                                                                                                                                                                                                                                                                                                                                                                           |
| ABC66526 A/duck/Guangxi/1378/2004 (H5N1)            | .....-.....L.RP...                                                                                                                                                                                                                                                                                                                                                                                                                                                                                                                      |
| ABI94747 A/duck/Hubei/wg/2002 (H5N1)                | .....-.....A.....SP...                                                                                                                                                                                                                                                                                                                                                                                                                                                                                                                  |
| ABJ96698 A/goose/Guiyang/337/2006 (H5N1)            | .....-.....P.....L.....L.E...                                                                                                                                                                                                                                                                                                                                                                                                                                                                                                           |

  

| Consensus sequence                                  | NVV <span style="border: 1px solid red;">W</span> L <span style="border: 1px solid red;">I</span> K <span style="border: 1px solid red;">N</span> S <span style="border: 1px solid red;">T</span> Y <span style="border: 1px solid red;">P</span> T <span style="border: 1px solid red;">I</span> K <span style="border: 1px solid red;">R</span> S <span style="border: 1px solid red;">Y</span> N <span style="border: 1px solid red;">N</span> T <span style="border: 1px solid red;">N</span> Q <span style="border: 1px solid red;">E</span> D <span style="border: 1px solid red;">L</span> L <span style="border: 1px solid red;">V</span> L <span style="border: 1px solid red;">W</span> G <span style="border: 1px solid red;">I</span> H <span style="border: 1px solid red;">H</span> P <span style="border: 1px solid red;">N</span> D <span style="border: 1px solid red;">A</span> E <span style="border: 1px solid red;">Q</span> T <span style="border: 1px solid red;">K</span> L <span style="border: 1px solid red;">Y</span> Q <span style="border: 1px solid red;">N</span> P <span style="border: 1px solid red;">T</span> T <span style="border: 1px solid red;">Y</span> I <span style="border: 1px solid red;">S</span> V <span style="border: 1px solid red;">G</span> T <span style="border: 1px solid red;">S</span> T <span style="border: 1px solid red;">L</span> |
|-----------------------------------------------------|---------------------------------------------------------------------------------------------------------------------------------------------------------------------------------------------------------------------------------------------------------------------------------------------------------------------------------------------------------------------------------------------------------------------------------------------------------------------------------------------------------------------------------------------------------------------------------------------------------------------------------------------------------------------------------------------------------------------------------------------------------------------------------------------------------------------------------------------------------------------------------------------------------------------------------------------------------------------------------------------------------------------------------------------------------------------------------------------------------------------------------------------------------------------------------------------------------------------------------------------------------------------------------------------------------------------------------------------------------------------------------------------------|
| CAA24269 A/Aichi/2/1968 (H3N2)                      | RLN..T.SG...VINDVTFP..NDNF.K.YI.....STNQ...S..VQASGRVT.S.RRS                                                                                                                                                                                                                                                                                                                                                                                                                                                                                                                                                                                                                                                                                                                                                                                                                                                                                                                                                                                                                                                                                                                                                                                                                                                                                                                                      |
| ACF54598 A/WSN/1933 (H1N1)                          | .LL..T..GDS..KLTN..V..KKGKEV.....V...SSSD..QS..S.GNA.V..AS.NY                                                                                                                                                                                                                                                                                                                                                                                                                                                                                                                                                                                                                                                                                                                                                                                                                                                                                                                                                                                                                                                                                                                                                                                                                                                                                                                                     |
| ACQ55359 A/California/07/2009 (H1N1)                | .LI..V..GNS..KLSK..I..KKGKEV.....STS.D.OS...ADA.VF..S.RI                                                                                                                                                                                                                                                                                                                                                                                                                                                                                                                                                                                                                                                                                                                                                                                                                                                                                                                                                                                                                                                                                                                                                                                                                                                                                                                                          |
| AAA64366 A/Singapore/1/1957 (H2N2)                  | .M..T..E.N..VA..G...SG.QM.II..V...ET..RT...VG..V.....                                                                                                                                                                                                                                                                                                                                                                                                                                                                                                                                                                                                                                                                                                                                                                                                                                                                                                                                                                                                                                                                                                                                                                                                                                                                                                                                             |
| ABD28180 A/Anhui/1/2005 (H5N1)                      | .....N.....I.....S.....                                                                                                                                                                                                                                                                                                                                                                                                                                                                                                                                                                                                                                                                                                                                                                                                                                                                                                                                                                                                                                                                                                                                                                                                                                                                                                                                                                           |
| ABQ58979 A/Beijing/01/2003 (H5N1)                   | .....N.....E..I.....                                                                                                                                                                                                                                                                                                                                                                                                                                                                                                                                                                                                                                                                                                                                                                                                                                                                                                                                                                                                                                                                                                                                                                                                                                                                                                                                                                              |
| ABE68931 A/Goose/Shantou/1621/05 (H5N1)             | .....A.....                                                                                                                                                                                                                                                                                                                                                                                                                                                                                                                                                                                                                                                                                                                                                                                                                                                                                                                                                                                                                                                                                                                                                                                                                                                                                                                                                                                       |
| AAC40508 A/Hong Kong/156/97 (H5N1)                  | .....A.....V.....                                                                                                                                                                                                                                                                                                                                                                                                                                                                                                                                                                                                                                                                                                                                                                                                                                                                                                                                                                                                                                                                                                                                                                                                                                                                                                                                                                                 |
| ABW06108 A/Indonesia/5/2005 (H5N1)                  | .....K.....R.....I.....                                                                                                                                                                                                                                                                                                                                                                                                                                                                                                                                                                                                                                                                                                                                                                                                                                                                                                                                                                                                                                                                                                                                                                                                                                                                                                                                                                           |
| ABO36644 A/Shenzhen/406H/2006 (H5N1)                | .I.....N.....I.....S.....                                                                                                                                                                                                                                                                                                                                                                                                                                                                                                                                                                                                                                                                                                                                                                                                                                                                                                                                                                                                                                                                                                                                                                                                                                                                                                                                                                         |
| AAO52864 A/Silky Chicken/Hong Kong/SF189/01 (H5N1)  | .....-.....                                                                                                                                                                                                                                                                                                                                                                                                                                                                                                                                                                                                                                                                                                                                                                                                                                                                                                                                                                                                                                                                                                                                                                                                                                                                                                                                                                                       |
| AAS65615 A/Thailand/1 (KAN-1)/2004 (H5N1)           | .....-.....                                                                                                                                                                                                                                                                                                                                                                                                                                                                                                                                                                                                                                                                                                                                                                                                                                                                                                                                                                                                                                                                                                                                                                                                                                                                                                                                                                                       |
| ABQ58925 A/Turkey/65596/2006 (H5N1)                 | .....DNA.....R.....                                                                                                                                                                                                                                                                                                                                                                                                                                                                                                                                                                                                                                                                                                                                                                                                                                                                                                                                                                                                                                                                                                                                                                                                                                                                                                                                                                               |
| ABP51977 A/Viet Nam/1203/2004 (H5N1)                | .....-.....                                                                                                                                                                                                                                                                                                                                                                                                                                                                                                                                                                                                                                                                                                                                                                                                                                                                                                                                                                                                                                                                                                                                                                                                                                                                                                                                                                                       |
| ACJ68614 A/Xinjiang/1/2006 (H5N1)                   | .....N.....R.....                                                                                                                                                                                                                                                                                                                                                                                                                                                                                                                                                                                                                                                                                                                                                                                                                                                                                                                                                                                                                                                                                                                                                                                                                                                                                                                                                                                 |
| AAW19638 A/blackbird/Hunan/1/2004 (H5N1)            | .....A.....A.....                                                                                                                                                                                                                                                                                                                                                                                                                                                                                                                                                                                                                                                                                                                                                                                                                                                                                                                                                                                                                                                                                                                                                                                                                                                                                                                                                                                 |
| ABD14809 A/chicken/Guangxi/12/2004 (H5N1)           | .....A.....I.....R.....                                                                                                                                                                                                                                                                                                                                                                                                                                                                                                                                                                                                                                                                                                                                                                                                                                                                                                                                                                                                                                                                                                                                                                                                                                                                                                                                                                           |
| AAK53508 A/chicken/Henan/16/2004 (H5N1)             | .....-.....R.....                                                                                                                                                                                                                                                                                                                                                                                                                                                                                                                                                                                                                                                                                                                                                                                                                                                                                                                                                                                                                                                                                                                                                                                                                                                                                                                                                                                 |
| AAV97603 A/chicken/Korea/ES/03 (H5N1)               | .....A.....R.....                                                                                                                                                                                                                                                                                                                                                                                                                                                                                                                                                                                                                                                                                                                                                                                                                                                                                                                                                                                                                                                                                                                                                                                                                                                                                                                                                                                 |
| ACO07033 A/chicken/Vietnam/NCVD-016/2008 (H5N1)     | .....N..P..VN..T.....EK..IRI...N.S.....                                                                                                                                                                                                                                                                                                                                                                                                                                                                                                                                                                                                                                                                                                                                                                                                                                                                                                                                                                                                                                                                                                                                                                                                                                                                                                                                                           |
| ACJ26242 A/common magpie/Hong Kong/5052/2007 (H5N1) | .....GNA...K.....E.....R.....I.....                                                                                                                                                                                                                                                                                                                                                                                                                                                                                                                                                                                                                                                                                                                                                                                                                                                                                                                                                                                                                                                                                                                                                                                                                                                                                                                                                               |
| ABC66526 A/duck/Guangxi/1378/2004 (H5N1)            | .....A.....                                                                                                                                                                                                                                                                                                                                                                                                                                                                                                                                                                                                                                                                                                                                                                                                                                                                                                                                                                                                                                                                                                                                                                                                                                                                                                                                                                                       |
| ABI94747 A/duck/Hubei/wg/2002 (H5N1)                | .....A.....                                                                                                                                                                                                                                                                                                                                                                                                                                                                                                                                                                                                                                                                                                                                                                                                                                                                                                                                                                                                                                                                                                                                                                                                                                                                                                                                                                                       |
| ABJ96698 A/goose/Guiyang/337/2006 (H5N1)            | .....S.....I.....N.....                                                                                                                                                                                                                                                                                                                                                                                                                                                                                                                                                                                                                                                                                                                                                                                                                                                                                                                                                                                                                                                                                                                                                                                                                                                                                                                                                                           |
